# Supplementary material
Source: Springer Nature journal article supplement (https://www.springermedizin.de/resource/supplementary/12937_2013_742_MOESM1_ESM.pdf/25653738)
Supplement: MOESM1 [file 25653738]

180 hypercholesterolaemic subjects were assessed for eligibility

93 subjects were excluded  
78 no NAFLD  
1 for metastatic HCC  
4 for other medical reasons  
10 declined to participate

87 subjects fulfilled inclusion criteria and were randomised

43 subjects were assigned to and received tocotrienols

44 subjects were assigned to and received placebo

13 subjects assigned to tocotrienols did not complete the study  
8 withdrew from the study  
3 were excluded for protocol violation  
2 missed final USG

10 subjects assigned to placebo did not complete the study  
6 withdrew from the study  
2 were excluded for protocol violation  
2 missed final USG

30 subjects assigned to tocotrienols completed the study and underwent baseline & final USG

34 subjects assigned to placebo completed the study and underwent baseline & final USG
